# Supplementary material for: Getting out of a (Strawberry) Jam: An Introduction to Supply Chain Analysis
Source: Atypon-hosted journal article supplement (doi:10.1287/ited.6.3.20), 2006-05-01
Supplement: ited.6.3.20-sm-var.zip [file 436-102-2004-Report.pdf › 436-102-2004-Report.pdf]

# ***ERDBEERENBURG: A SUPPLY CHAIN ANALYSIS***

K. KHAMMUANG & H. S. GAN

*(Report Outline Sheet)*

***Each group*** are required to produce ***one report*** (approximately 2-3 pages) on a ***weekly basis***, describing the activities performed and the results obtained during the week. These weekly reports are ***not*** to be submitted during the week, but should be collated as a ***final report*** to be submitted by the common due date (*4:30pm Friday, April 30, 2004.*). All submissions should be accompanied with the “blue sheet” signed by all members of the group and inserted into the pigeon hole located on the 4<sup>th</sup> Floor, Block E, Mechanical and Manufacturing Engineering Building. The contents of the weekly reports are outlined as follows:

**Week 1:** Description of the supply chain and how tasks are delegated among group members.

**Week 2:** Description of the proposed solution procedures and discussions of their corresponding performances based on the sample data.

**Week 3:** Performance of your initial plan.

**Week 4:** Performance of your perturbed plan.

**Week 5:** N.A.

**Week 6:** A brief summary supervisor’s presentation.

DEPARTMENT OF MECHANICAL AND MANUFACTURING ENGINEERING, THE UNIVERSITY OF MELBOURNE, VIC 3010, AUSTRALIA

*E-mail address:* kpopk,hsgan@name.mu.oz.au
