# Supplementary material for: Getting out of a (Strawberry) Jam: An Introduction to Supply Chain Analysis
Source: Atypon-hosted journal article supplement (doi:10.1287/ited.6.3.20), 2006-05-01
Supplement: ited.6.3.20-sm-var.zip [file 436-102-2004-Task.pdf › 436-102-2004-Task.pdf]

# ***ERDBEERENBURG: A SUPPLY CHAIN ANALYSIS***

K. KHAMMUANG & H. S. GAN

(*Task Sheet*)

**Week 1:** Students are to familiarise themselves with the supply chain, for example the flow of information within the supply chain, the costs involved in each supply chain “partner” and the overall supply chain cost. Tasks should be delegated among group members.

**Week 2:** Each group is expected to propose solution procedures to each of the supply chain “partners” using sample data (generated by each group).

**Week 3:** Given a set of initial supply chain data, each group is required to generate an *initial plan* according to the solution procedures proposed in Week 2.

**Week 4:** A set of perturbation will be introduced to the supply chain. Students are to provide a re-active solution in response to the perturbation and evaluate the total supply chain cost of the *new plan*.

**Week 5:** Each group is required to present their results and findings from previous weeks.

**Week 6:** Supervisors will conclude this week by attempting to answer an important question in planning under uncertainty: **What should have been done if information on perturbations are known *a priori*?** Supervisors will discuss the method of *deterministic planning*, *robust planning* and *on-line planning*. Proactive and reactive methods of planning under uncertainty will also be discussed.

DEPARTMENT OF MECHANICAL AND MANUFACTURING ENGINEERING, THE UNIVERSITY OF MELBOURNE, VIC 3010, AUSTRALIA

*E-mail address:* kpopk,hsgan@name.mu.oz.au
