# Supplementary material for: Getting out of a (Strawberry) Jam: An Introduction to Supply Chain Analysis
Source: Atypon-hosted journal article supplement (doi:10.1287/ited.6.3.20), 2006-05-01
Supplement: ited.6.3.20-sm-var.zip [file Formulation2004.pdf › Formulation2004.pdf]

# ***ERDBEERENBURG: MATHEMATICAL PROGRAM FORMULATION***

K. KHAMMUANG & H. S. GAN

---

## *Input Parameters*

---

$n$  = number of customers

$T$  = maximum time (integer) in time horizon  $[0, T]$

$m$  = number of “machines” to make jams from strawberries

$B_i$  = demand amount, in bottles of jams, of customer  $i$

$G_i$  = demand amount, in grams of strawberries, of customer  $i$

$g_{ik} = 1$ , if customer  $i$  requests for Grade  $k$  strawberries; 0, otherwise

$DD_i$  = desired due date for customer  $i$

$d_{ij}$  = distance between locations  $i$  and  $j$ ; location indices are 1: depot, 2: customer 1, 3: customer 2 etc.

## INVENTORY

$OC_k$  = cost per order for Grade  $k$

$UC_{jk}$  = unit cost of the  $j^{\text{th}}$  “cost step” for Grade  $k$  strawberries

$C_{jk}$  = cut-off amount of Grade  $k$  strawberries for the  $j^{\text{th}}$  “cost step”

$L_k$  = order limit for Grade  $k$  strawberries

$L_T$  = total order limit

$l_k$  = order lead time for Grade  $k$  strawberries

## PRODUCTION SCHEDULING

$SS$  = strawberry storage cost (per gram per day)

$p_i$  = processing time for strawberries of customer  $i$

## DELIVERY

$P$  = cost per pickup

$\alpha$  = tardiness cost

$\beta$  = earliness cost

$JS$  = jam storage cost (per bottle per day)

$DC$  = distance cost

$SPEED$  = truck travel speed

————— *Decision Variables* —————

### INVENTORY

$x_{ij} = 1$ , if strawberries of customer  $i$  are ordered on day  $j$ ; 0, otherwise

$y_{jk} = 1$ , if Grade  $k$  strawberries are ordered on day  $j$ ; 0, otherwise

$f_{jk}^+$  = amount of Grade  $k$  strawberries ordered (in grams) above  $C_{2k}$  for day  $j$

$s_{jk}^+$  = amount of Grade  $k$  strawberries ordered (in grams) between  $C_{1k}$  and  $C_{2k}$  for day  $j$

$o_i$  = order date for customer  $i$

$a_i$  = strawberry arrival date for customer  $i$

### PRODUCTION SCHEDULING

$t_i$  = production start time of customer  $i$

$\theta_{jk}$  = start time of the  $j^{\text{th}}$  operation on machine  $k$

$u_{ijk} = 1$ , if customer  $i$  is the  $j^{\text{th}}$  operation on machine  $k$ ; 0, otherwise

$c_i$  = completion time of customer  $i$ 's jams

### DELIVERY

$p_{ij} = 1$ , if customer  $i$ 's jams are collected on the  $j^{\text{th}}$  pickup; 0, otherwise

$z_{jk} = 1$ , if the  $j^{\text{th}}$  pickup is on day  $k$ ; 0, otherwise

$PT_j$  = time of the  $j^{\text{th}}$  pickup (integer)

$EPT_j$  = earliest time of the  $j^{\text{th}}$  pickup

$Time_j$  = total time taken for the  $j^{\text{th}}$  pickup = arrival time at depot - start time at depot

$r_i$  = collection time of customer  $i$ 's strawberries

$w_{ijk}^x = 1$ , if the  $k^{\text{th}}$  arc of the tour for the  $x^{\text{th}}$  pickup goes from location  $i$  to location  $j$ ; 0, otherwise

$TD_k^x$  = total distance travelled (w.r.t depot) at the end of the  $k^{\text{th}}$  arc of the  $x^{\text{th}}$  pickup

$TotalDist_x$  = total distance travelled for the  $x^{\text{th}}$  pickup

$Dist_j$  = total distance travelled (w.r.t depot) when customer  $j$  receives his/her jams

$R_i$  = time at which customer  $i$  receives the jam

$T_i$  = customer  $i$ 's tardiness

$E_i$  = customer  $i$ 's earliness

### ————— *Problem Formulation* —————

Minimise

$$\begin{aligned}
 (1) \quad & \sum_{k=1}^2 \sum_{j=1}^T OC_k y_{jk} + \sum_{k=1}^2 \sum_{j=1}^T \left\{ UC_{1k} \left[ \left( \sum_{i=1}^n G_i g_{ik} x_{ij} \right) - f_{jk}^+ - s_{jk}^+ \right] + UC_{2k} s_{jk}^+ + UC_{3k} f_{jk}^+ \right\} \\
 & + SS \sum_{i=1}^n G_i (t_i - a_i) + P \sum_{j=1}^n \sum_{k=1}^T z_{jk} + \alpha \sum_{i=1}^n T_i + \beta \sum_{i=1}^n E_i + JS \sum_{i=1}^n B_i (r_i - c_i) \\
 & + DC \sum_{i=1}^n TotalDist_i
 \end{aligned}$$

Subject to

### INVENTORY CONSTRAINTS

$$(2) \quad \sum_{j=0}^T x_{ij} = 1, \quad \forall i$$

$$(3) \quad \sum_{i=1}^n G_i g_{ik} x_{ij} \leq L_k, \quad \forall j, k$$

$$(4) \quad \sum_{i=1}^n G_i x_{ij} \leq L_T, \quad \forall j$$

$$(5) \quad \sum_{i=1}^n g_{ik} x_{ij} \leq n y_{jk}, \quad \forall j, k$$

$$(6) \quad \left( \sum_{i=1}^n G_i g_{ik} x_{ij} \right) - C_{2k} = f_{jk}^+ - f_{jk}^-, \quad \forall j, k$$

$$(7) \quad \left( \sum_{i=1}^n G_i g_{ik} x_{ij} \right) - f_{jk}^+ - C_{1k} = s_{jk}^+ - s_{jk}^-, \quad \forall j, k$$

$$(8) \quad o_i = \sum_{j=0}^T j x_{ij}, \quad \forall i$$

$$(9) \quad a_i = o_i + \sum_{k=1}^2 g_{ik} l_k, \quad \forall i$$

### PRODUCTION SCHEDULING CONSTRAINTS

$$(10) \quad t_i \geq a_i, \quad \forall i$$

$$(11) \quad t_i \geq \theta_{jk} - M(1 - u_{ijk}), \quad \forall i, j, k$$

$$(12) \quad t_i \leq \theta_{jk} + M(1 - u_{ijk}), \quad \forall i, j, k$$

$$(13) \quad \theta_{jk} \geq \theta_{(j-1)k} + \sum_{i=1}^n p_i u_{i(j-1)k}, \quad \forall j, k$$

$$(14) \quad \sum_{i=1}^n u_{ijk} \leq 1, \quad \forall j, k$$

$$(15) \quad \sum_{j=1}^n \sum_{k=1}^m u_{ijk} = 1, \quad \forall i$$

$$(16) \quad \sum_{i=1}^n u_{ijk} \leq \sum_{i=1}^n u_{i(j-1)k}, \quad \forall j, k$$

$$(17) \quad c_i = t_i + p_i, \quad \forall i$$

### DELIVERY CONSTRAINTS

$$(18) \quad \sum_{j=0}^T p_{ij} = 1, \quad \forall i$$

$$(19) \quad p_{ij} \leq \sum_{k=0}^T z_{jk}, \quad \forall i, j$$

$$(20) \quad \sum_{j=1}^n z_{jk} \leq 1, \quad \forall k$$

$$(21) \quad \sum_{k=0}^T z_{jk} \leq 1, \quad \forall j$$

$$(22) \quad PT_j = \sum_{k=0}^T k z_{jk}, \quad \forall j$$

$$(23) \quad EPT_j \geq PT_{j-1} + Time_{j-1} - M \left( 1 - \sum_{k=0}^T z_{jk} \right), \quad \forall j$$

$$(24) \quad EPT_j \leq PT_{j-1} + Time_{j-1} + M \left( 1 - \sum_{k=0}^T z_{jk} \right), \quad \forall j$$

$$(25) \quad PT_0 = Time_0 = 0$$

$$(26) \quad EPT_j \leq \sum_{k=0}^T kz_{jk}, \quad \forall j$$

$$(27) \quad r_i \geq PT_j - M(1 - p_{ij}), \quad \forall i, j$$

$$(28) \quad r_i \leq PT_j + M(1 - p_{ij}), \quad \forall i, j$$

$$(29) \quad r_i \geq c_i, \quad \forall i$$

$$(30) \quad \sum_{j=1}^{n+1} \sum_{k=1}^{n+1} w_{(i+1)jk}^x = p_{ix}, \quad \forall i, x$$

$$(31) \quad \sum_{i=1}^{n+1} \sum_{k=1}^{n+1} w_{i(j+1)k}^x = p_{jx}, \quad \forall j, x$$

$$(32) \quad \sum_{i=1}^{n+1} w_{ijk}^x = \sum_{p=1}^{n+1} w_{jp(k+1)}^x, \quad \forall j, k, x$$

$$(33) \quad \sum_{j=1}^{n+1} w_{1j1}^x = 1, \quad \forall x$$

$$(34) \quad \sum_{i=1}^{n+1} w_{i1(n+1)}^x = 1, \quad \forall x$$

$$(35) \quad TD_q^x = \sum_{k=1}^q \sum_{i=1}^{n+1} \sum_{j=1}^{n+1} d_{ij} w_{ijk}^x, \quad \forall q$$

$$(36) \quad TotalDist_x = TD_{n+1}^x, \quad \forall x$$

$$(37) \quad Time_x = \frac{TotalDist_x}{SPEED}, \quad \forall x$$

$$(38) \quad Dist_j \geq TD_k^x - M(1 - w_{ijk}^x), \quad \forall i, j, k, x$$

$$(39) \quad Dist_j \leq TD_k^x + M(1 - w_{ijk}^x), \quad \forall i, j, k, x$$

$$(40) \quad R_i = r_i + \frac{Dist_i}{SPEED}, \quad \forall i$$

$$(41) \quad R_i - DD_i = T_i - E_i, \quad \forall i$$

DEPARTMENT OF MECHANICAL AND MANUFACTURING ENGINEERING, THE UNIVERSITY OF MELBOURNE, VIC 3010, AUSTRALIA

*E-mail address:* kpopk,hsgan@mame.mu.oz.au
